# Supplementary material for: ac4C acetylation of RUNX2 catalyzed by NAT10 spurs osteogenesis of BMSCs and prevents ovariectomy-induced bone loss
Source: PubMed Central journal article supplement — Mol Ther Nucleic Acids. 2021 Jul 2;26:135–47. doi: 10.1016/j.omtn.2021.06.022 (PMC8413676; doi:10.1016/j.omtn.2021.06.022), 2021-07-02
Supplement: mmc1.pdf [file mmc1.pdf]

OMTN, Volume 26

## **Supplemental information**

**ac4C acetylation of RUNX2 catalyzed by NAT10**

**spurs osteogenesis of BMSCs and**

**prevents ovariectomy-induced bone loss**

**W. Yang, H.Y. Li, Y.F. Wu, R.J. Mi, W.Z. Liu, X. Shen, Y.X. Lu, Y.H. Jiang, M.J. Ma, and H.Y. Shen**

## Supplementary data

**Table S1: Characteristics of the study subjects.**

|                                          | Normal control | Postmenopausal osteoporosis Patients |
|------------------------------------------|----------------|--------------------------------------|
| Number                                   | 6              | 6                                    |
| Age (years)                              | 56.38±6.98     | 65.45±6.82                           |
| Sex                                      | Female         | Female                               |
| Hight (cm)                               | 156.35±7.49    | 154.94±5.64                          |
| Weight (kg)                              | 56.85±7.68     | 58.16±5.37                           |
| BMI (kg/m <sup>2</sup> )                 | 23.79±2.74     | 22.62±3.53                           |
| Age of menarche<br>(years)               | 14.25±2.04     | 13.16±1.18                           |
| Age of menopause<br>(years)              | 50.35±3.57     | 52.43±2.82                           |
| Lumbar spine BMD<br>(g/cm <sup>2</sup> ) | 1.53±0.24      | 0.56±0.31*                           |
| Lumbar spine <i>T</i> score              | 0.35±1.07      | -2.63±1.16*                          |
| Total hip BMD<br>(g/cm <sup>2</sup> )    | 1.15±0.24      | 0.61±0.17*                           |
| Total hip <i>T</i> score                 | 0.37±1.12      | -1.83±0.58*                          |

Data are shown as the mean ± SD, n=6 in each group. P values for all variables are the result of independent t tests between the control and osteoporosis groups. \* $p < 0.05$ , \*\* $p < 0.01$ . BMI: body mass index; BMD: bone mineral density.

**Supplementary Table 2: Primers of the analyzed genes**

| Species | NCBI Gene ID | Gene Name | Forward Primer          | Reverse Primer         |
|---------|--------------|-----------|-------------------------|------------------------|
| Human   | 2597         | GAPDH     | AAGGTGAAGGTCGGAGTCAA    | AATGAAGGGGTCATTGATGG   |
| Human   | 55226        | NAT10     | ATTCACACCGTAAGCAGCGA    | CAGGTCATTTCGGGGTCTGTC  |
| Mouse   | 98956        | NAT10     | CACAAACATTCGCTACTGCTACT | AACGCTTCAAAAATCCTGGAGG |
| Human   | 860          | RUNX2     | AAAGACAAGCACAAGTAAATC   | CATAATTGAACCCTCTATCCA  |
| Human   | 4088         | SMAD3     | ATAGGTGCTTTGGGCGTATG    | CTCTTGCCCTTTTCAACTGTCC |
| Human   | 3371         | TNC       | CAAAGATGTCCCAGTGACTGTC  | CGCATTGTCTAAGTTGTTGC   |
| Human   | 1277         | COL1A1    | GCCTCAAGGTATTGCTGGAC    | ACCTTGTTTGCCAGGTTAC    |
| Human   | 121340       | Osterix   | CCTCTGCGGGACTCAACAAC    | AGCCATTAGTGCTTGTAAGG   |

**Supplementary Table 3: The siRNA sequences of the analyzed genes.**

| Gene Name           | Sense (5'-3')         | Antisense (5'-3')     |
|---------------------|-----------------------|-----------------------|
| NAT10<br>siRNA1     | GGGCCAGGCUGAACUAGUUTT | AACUAGUUCAGCCUGGCCCTT |
| NAT10<br>siRNA2     | GCAUUUGGGUACUCCAAUATT | UAUUGGAGUACCCAAAUGCTT |
| Negative<br>control | UUCUCCGAACGUGUCACGUTT | ACGUGACACGUUCGGAGAATT |

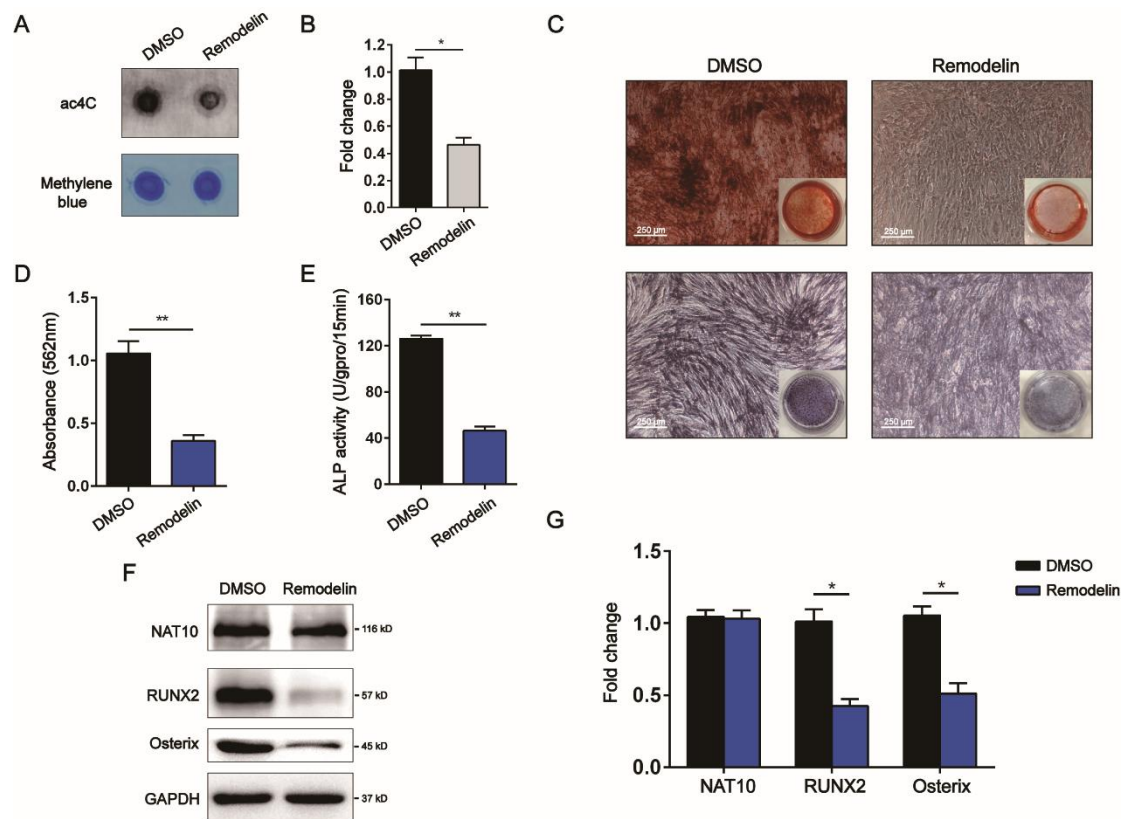

**Figure S1. Remodelin inhibits the osteogenic differentiation of BMSCs in vitro.**

(A) Dot blot analysis demonstrated that the ac4C level of total RNA decreased in BMSCs treated with 20  $\mu$ M Remodelin, n=6. (B) Densitometry quantitation of (A), n=6. (C) Remodelin decreased calcium nodule formation (upper panels) and ALP staining (lower panels) (scale bar=250  $\mu$ m), n=6. (D) ARS staining was quantified as the absorbance at 562 nm, n=6. (E) ALP activity was determined as units per gram of protein per 15 min, n=6. (F) Remodelin decreased protein levels of the markers of osteoblast differentiation, RUNX2 and Osterix during osteogenic induction, n=6. (G) Quantification of band intensities, n=6. All data are presented as the means  $\pm$  SDs. \* $p$  < 0.05, \*\* $p$  < 0.01 (n = 3 independent experiments).

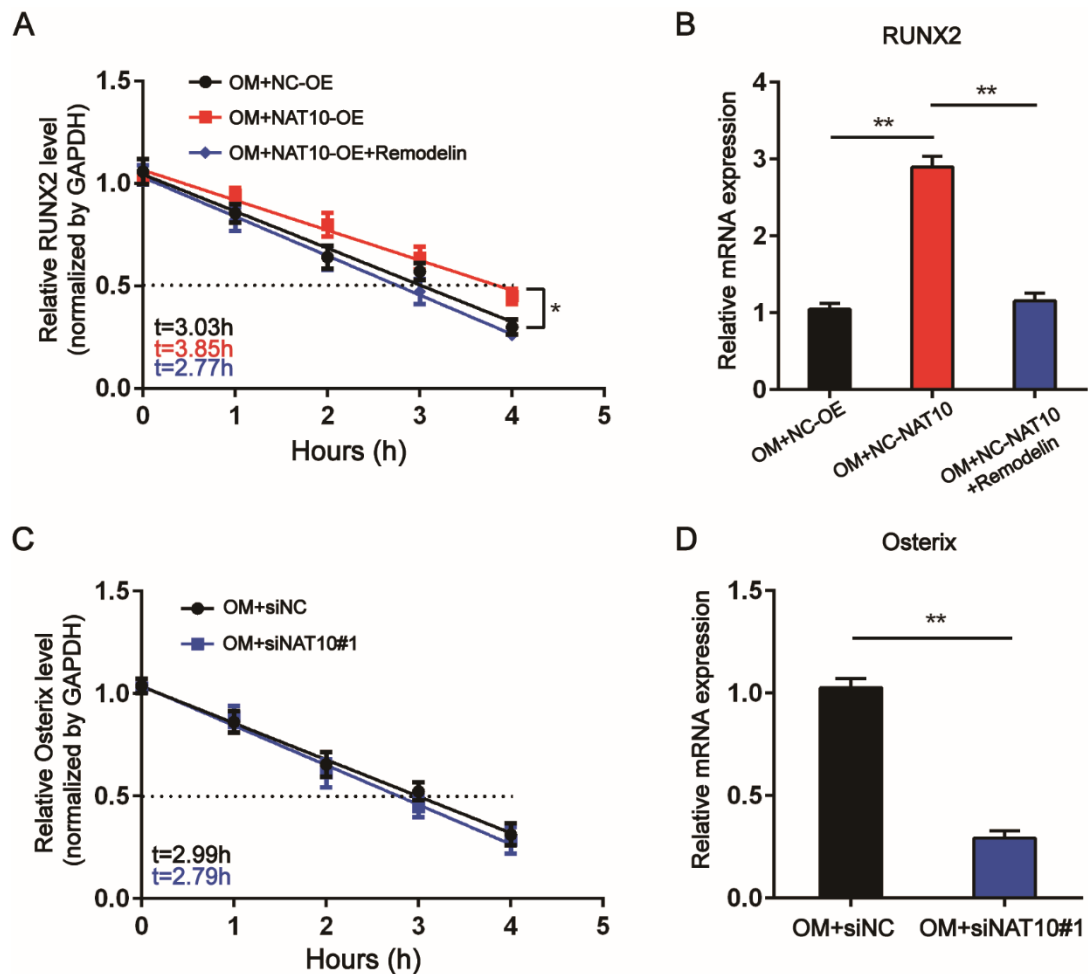

**Figure S2. NAT10 does not regulate the decay rate of Osterix during osteogenic differentiation.** (A) The decay rate of mRNA and qPCR analysis of RUNX2 at the indicated times after overexpressing NAT10 and treating with Remodelin,  $n=6$ . (B) RUNX2 expression was quantified by qPCR after overexpressing NAT10 and treating with Remodelin,  $n=6$ . (C) qPCR analysis of Osterix at the indicated times after silencing NAT10,  $n=6$ . (D) Osterix expression was quantified by qPCR after silencing NAT10,  $n=6$ . All data are presented as the means  $\pm$  SDs.  $*p < 0.05$ ,  $**p < 0.01$  ( $n = 3$  independent experiments).

**Data S1. The ac4C Peak locations of differentially acetylated genes.**

**Data S2. Gene ontology (GO) enrichment analysis of the differentially acetylated genes.**
